# Supplementary material
Source: PubMed Central journal article supplement (PMC2891752)

# Halogenated $\beta$ , $\gamma$ -methylene- and ethylidene-dGTP-DNA ternary complexes with DNA polymerase $\beta$ : structural evidence for stereospecific binding of the fluoro analogues

Vinod K. Batra<sup>a</sup>, Lars C. Pedersen<sup>a</sup>, William A. Beard<sup>a</sup>, Samuel H. Wilson<sup>a</sup>, Boris A. Kashemirov<sup>b</sup>, Thomas G. Upton<sup>b</sup>, Myron F. Goodman<sup>b</sup> and Charles E. McKenna<sup>\*b</sup>

<sup>a</sup>Laboratory of Structural Biology, NIEHS, National Institutes of Health DHHS, Research Triangle Park, North Carolina 27709. <sup>b</sup>Departments of Chemistry and Biology, University of Southern California, Los Angeles, California 90089

\*mckenna@usc.edu

For detailed synthesis and analytical data for compounds **1-9**, **15**, **16** see *Biochemistry* **2008**, *47*, 870-879 and *JACS* **2007**, *129*, 15412-15413.

## Supporting Information

### Table of Contents

|             |                                                                                                                                |    |
|-------------|--------------------------------------------------------------------------------------------------------------------------------|----|
| Table S1.   | Summary of HPLC peak retention and eluting buffer data for $\beta,\gamma$ -methylene bisphosphonate dGTP analogues 1 - 16..... | 3  |
| Figure S1.  | HPLC analysis (SAX) of the conversion of dGMP-Morph to 10/11.....                                                              | 4  |
| Figure S2.  | HPLC analysis (SAX) of 10/11 after dual-pass prep. HPLC.....                                                                   | 4  |
| Figure S3.  | HPLC analysis (SAX) of the conversion of dGMP-Morph to 12.....                                                                 | 5  |
| Figure S4.  | HPLC analysis (SAX) of 12 after dual-pass prep. HPLC.....                                                                      | 5  |
| Figure S5.  | HPLC analysis (SAX) of the conversion of dGMP-Morph to 13/14.....                                                              | 6  |
| Figure S6.  | HPLC analysis (SAX) of 13/14 after dual-pass prep. HPLC.....                                                                   | 6  |
| Figure S7.  | HRMS dGMP-EBP, 10/11 .....                                                                                                     | 7  |
| Figure S8.  | HRMS dGMP-DMBP, 12 .....                                                                                                       | 8  |
| Figure S9.  | HRMS dGMP-FMBP, 13/14.....                                                                                                     | 9  |
| Figure S10. | <sup>1</sup> H NMR of dGMP- $\beta,\gamma$ -EBP, 10/11 .....                                                                   | 10 |
| Figure S11. | <sup>31</sup> P NMR of dGMP- $\beta,\gamma$ -EBP, 10/11 ( <sup>1</sup> H decoupled).....                                       | 11 |

|             |                                                                                          |    |
|-------------|------------------------------------------------------------------------------------------|----|
| Figure S12. | $^1\text{H}$ NMR of dGMP- $\beta,\gamma$ -DMBP, 12.....                                  | 12 |
| Figure S13. | $^{31}\text{P}$ NMR of dGMP- $\beta,\gamma$ -DMBP, 12 ( $^1\text{H}$ decoupled) .....    | 13 |
| Figure S14. | $^1\text{H}$ NMR of dGMP- $\beta,\gamma$ -FMBP, 13/14 .....                              | 14 |
| Figure S15. | $^{31}\text{P}$ NMR of dGMP- $\beta,\gamma$ -FMBP, 13/14 ( $^1\text{H}$ decoupled) ..... | 15 |
| Figure S16. | $^{19}\text{F}$ NMR of dGMP- $\beta,\gamma$ -FMBP, 13/14.....                            | 16 |

**Table S1.** Summary of HPLC peak retention and eluting buffer data for  $\beta,\gamma$ -methylene bisphosphonate dGTP analogues **1 - 16**

(Column specifications and other HPLC information are given in the main article. See also: *Biochemistry* **2008**, 47, 870-879 and *JACS* **2007**, 129, 15412-15413.

| Compound (#)       | CXY                              | Retention time (column) | Buffer                            |
|--------------------|----------------------------------|-------------------------|-----------------------------------|
| dGMP               | -----                            | 3.5 min (C-18)          | 0.1N TEAB (2% CH <sub>3</sub> CN) |
|                    | -----                            | 8 min (SAX)             | 0-100% 0.5M TEAB gradient         |
| dGMP-Morph         | -----                            | 5.5 min (C-18)          | 0.1N TEAB (2% CH <sub>3</sub> CN) |
|                    | -----                            | 5 min (SAX)             | 0-100% 0.5M TEAB gradient         |
| dGMP-MBP (1)       | CH <sub>2</sub>                  | 16 min (SAX)            | 0-100% 0.5M TEAB gradient         |
| dGMP-DFBP (2)      | CF <sub>2</sub>                  | 17 min (SAX)            | 0-100% 0.5M TEAB gradient         |
| dGMP-MFBP (3/4)    | CHF                              | 13 min (SAX)            | 0-100% 0.5M LiCl gradient         |
| dGMP-DCBP (5)      | CCl <sub>2</sub>                 | 16 min (SAX)            | 0-100% 0.5M TEAB gradient         |
| dGMP-MCBP (6/7)    | CHCl                             | 17 min (SAX)            | 0-100% 0.5M TEAB gradient         |
| dGMP-MBBP (8/9)    | CHBr                             | 13 min (SAX)            | 0-100% 0.5M LiCl gradient         |
| dGMP-EBP (10/11)   | CH(CH <sub>3</sub> )             | 12 min (SAX)            | 0-100% 0.5M LiCl gradient         |
| dGMP-DMBP (12)     | C(CH <sub>3</sub> ) <sub>2</sub> | 11 min (SAX)            | 0-100% 0.5M LiCl gradient         |
| dGMP-FMBP (13/14)  | CF(CH <sub>3</sub> )             | 13 min (SAX)            | 0-100% 0.5M LiCl gradient         |
| dGMP-FCIBP (15/16) | CFCI                             | 12 min (SAX)            | 0-100% 0.5M LiCl gradient         |

### Figures S1-S6: HPLC analysis

Reaction mixtures were analyzed by injecting 2-3  $\mu$ L into the indicated column. The relative intensities of the weaker spectra have been increased up to 3- fold to aid in peak comparisons. The HPLC data were visualized using either Chromplot v1.2 (Rainin) or EZStart v7.4 (Shimadzu).

**Figure S1.** HPLC analysis (SAX) of the conversion of dGMP-Morph to **10/11**.

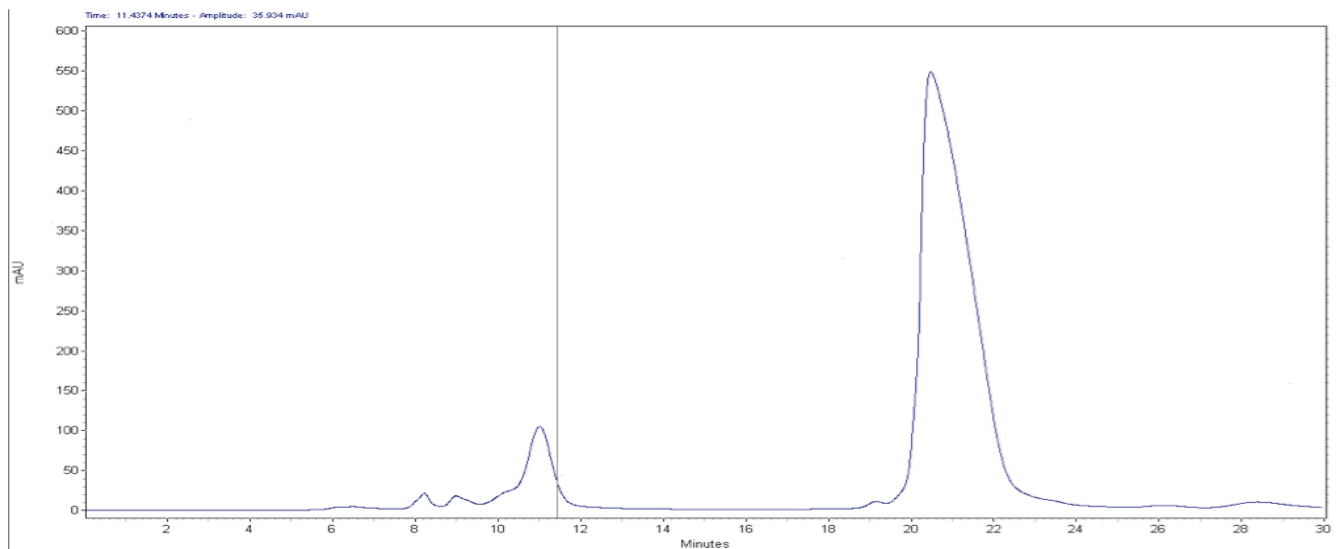

**Figure S2.** HPLC analysis (SAX) of **10/11** after dual-pass prep. HPLC.

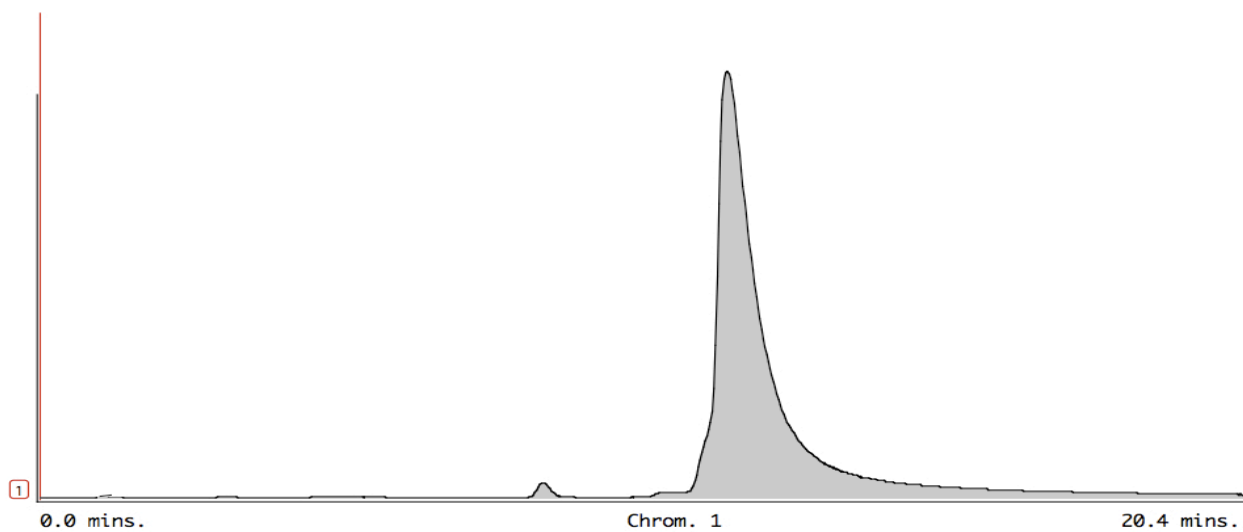

**Figure S3.** HPLC analysis (SAX) of the conversion of dGMP-Morph to **12**.

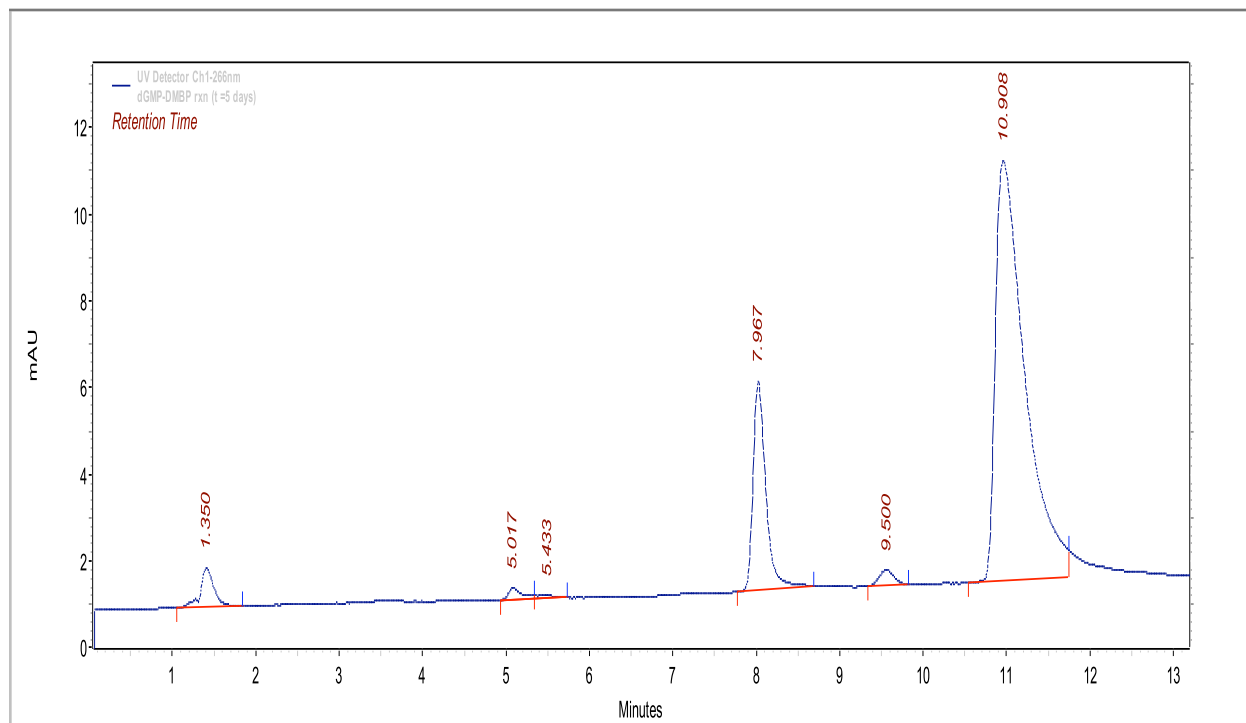

**Figure S4.** HPLC analysis (SAX) of **12** after dual-pass prep. HPLC.

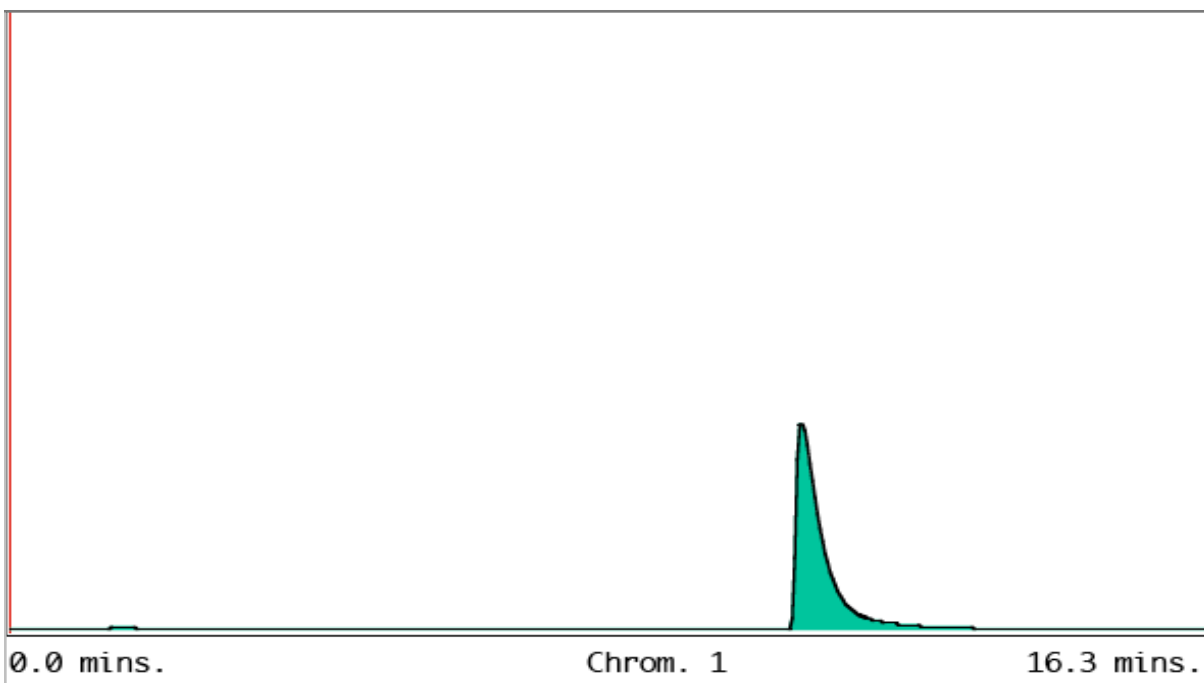

**Figure S5.** HPLC analysis (SAX) of the conversion of **dGMP-Morph** to **13/14**.

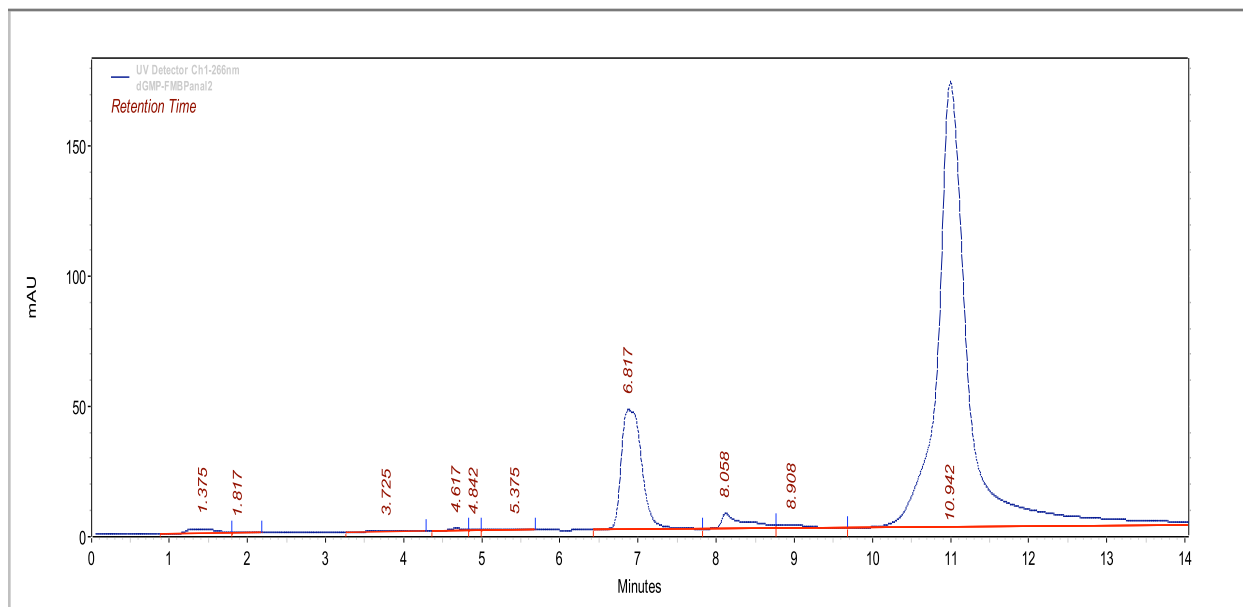

**Figure S6.** HPLC analysis (SAX) of **13/14** after dual-pass prep. HPLC.

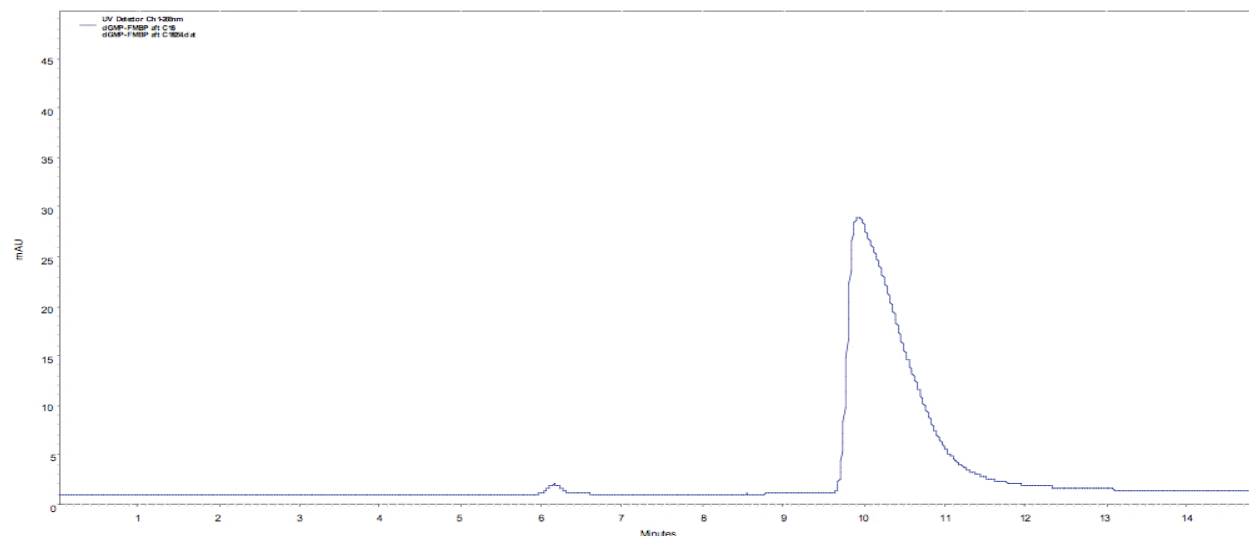

MS Analysis of  $\beta,\gamma$ -methylene analogues of dGTP  
Figure S7. HRMS dGMP-EBP, 10/11

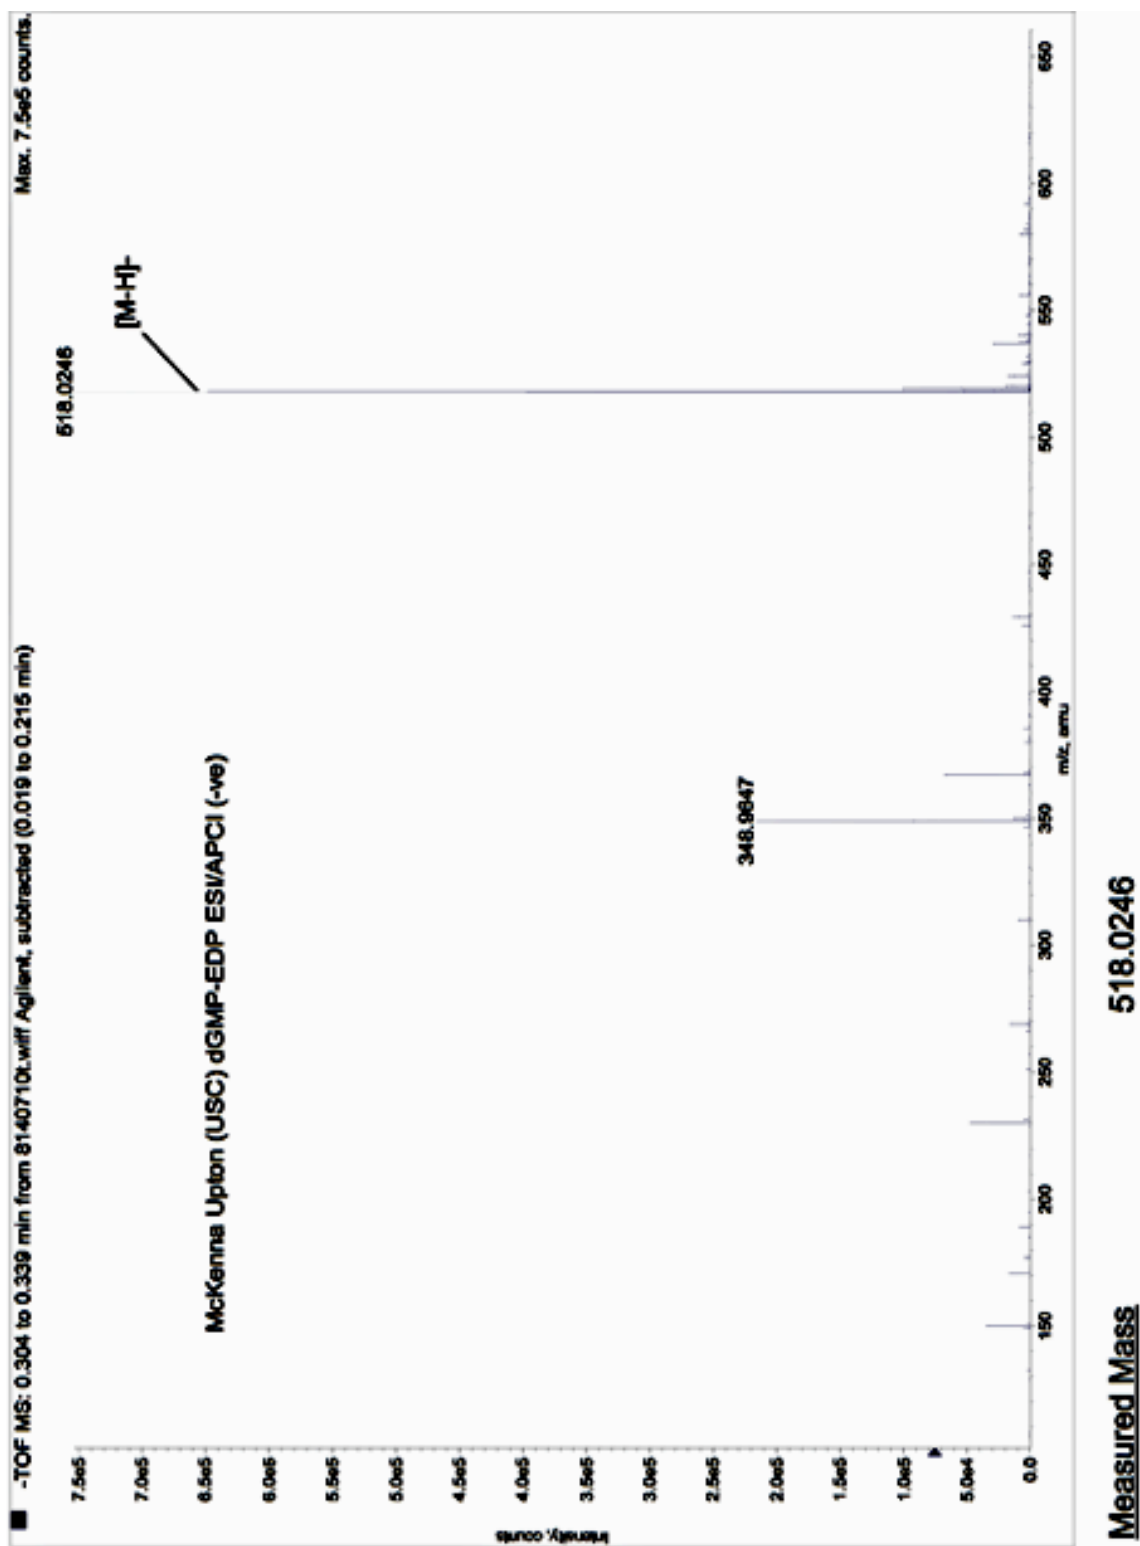

Figure S8. HRMS dGMP-DMBP, 12

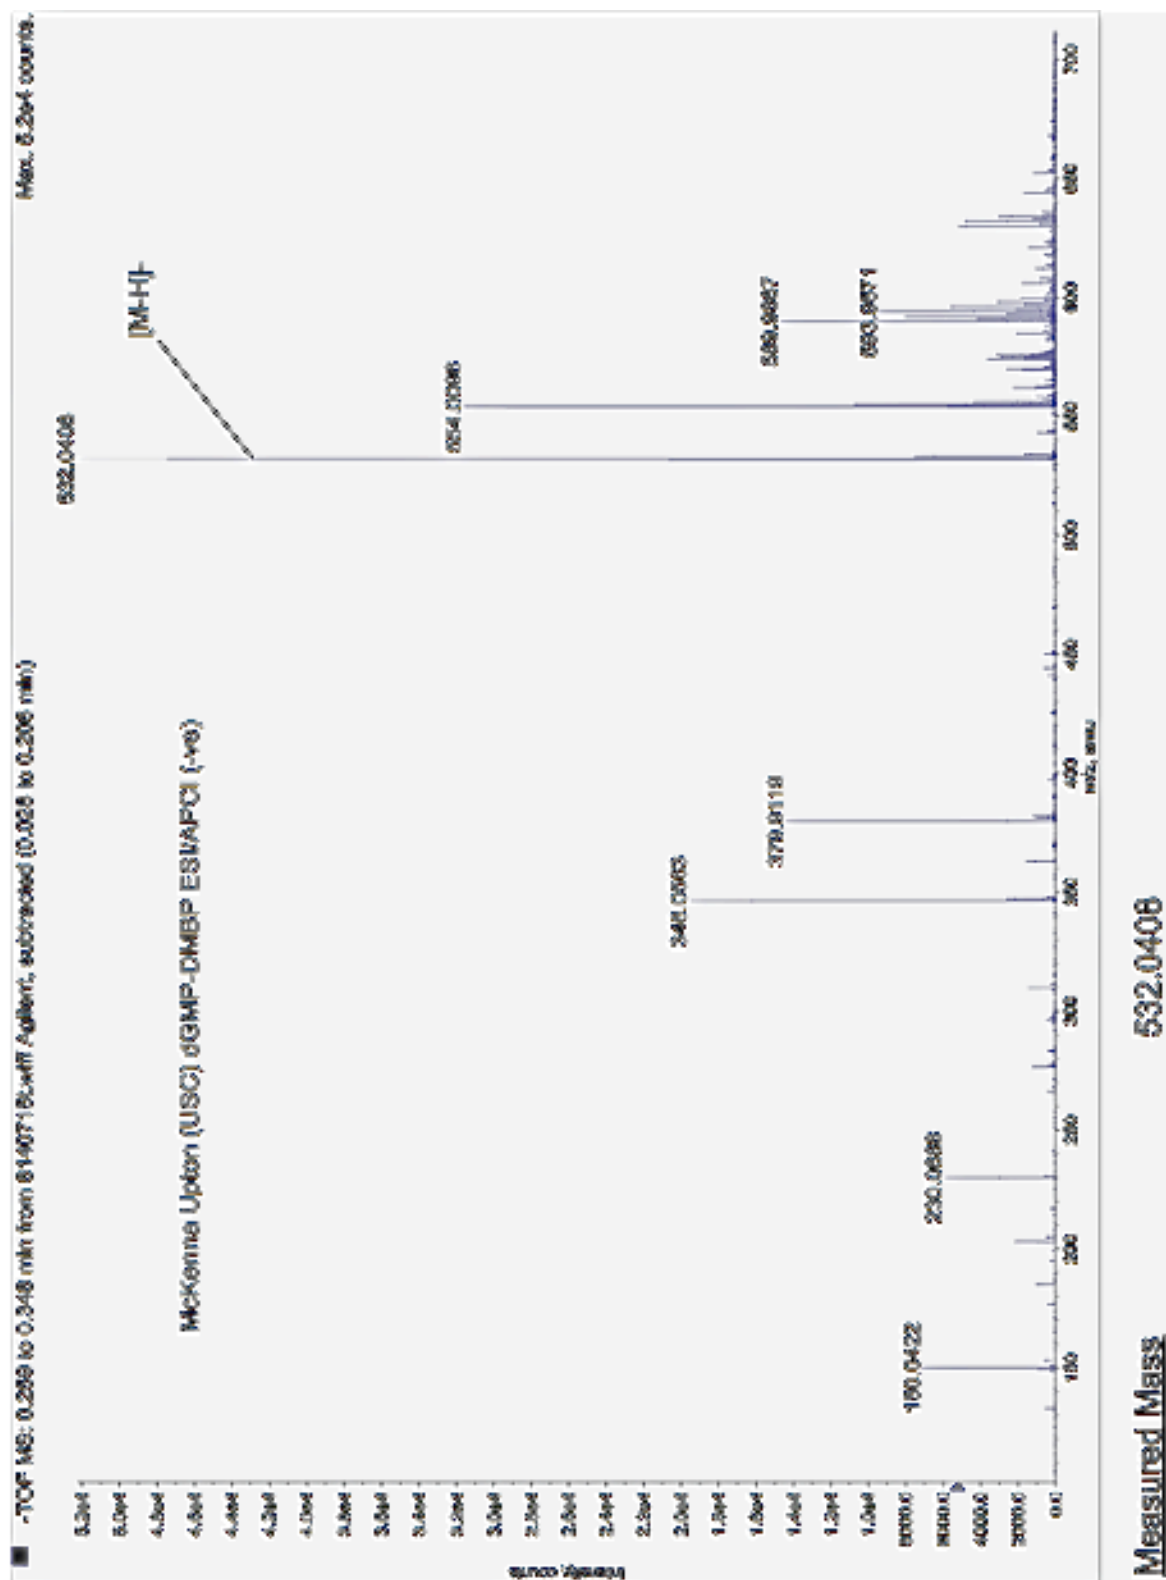



Figure S9. HRMS dGMP-FMBP, 13/14

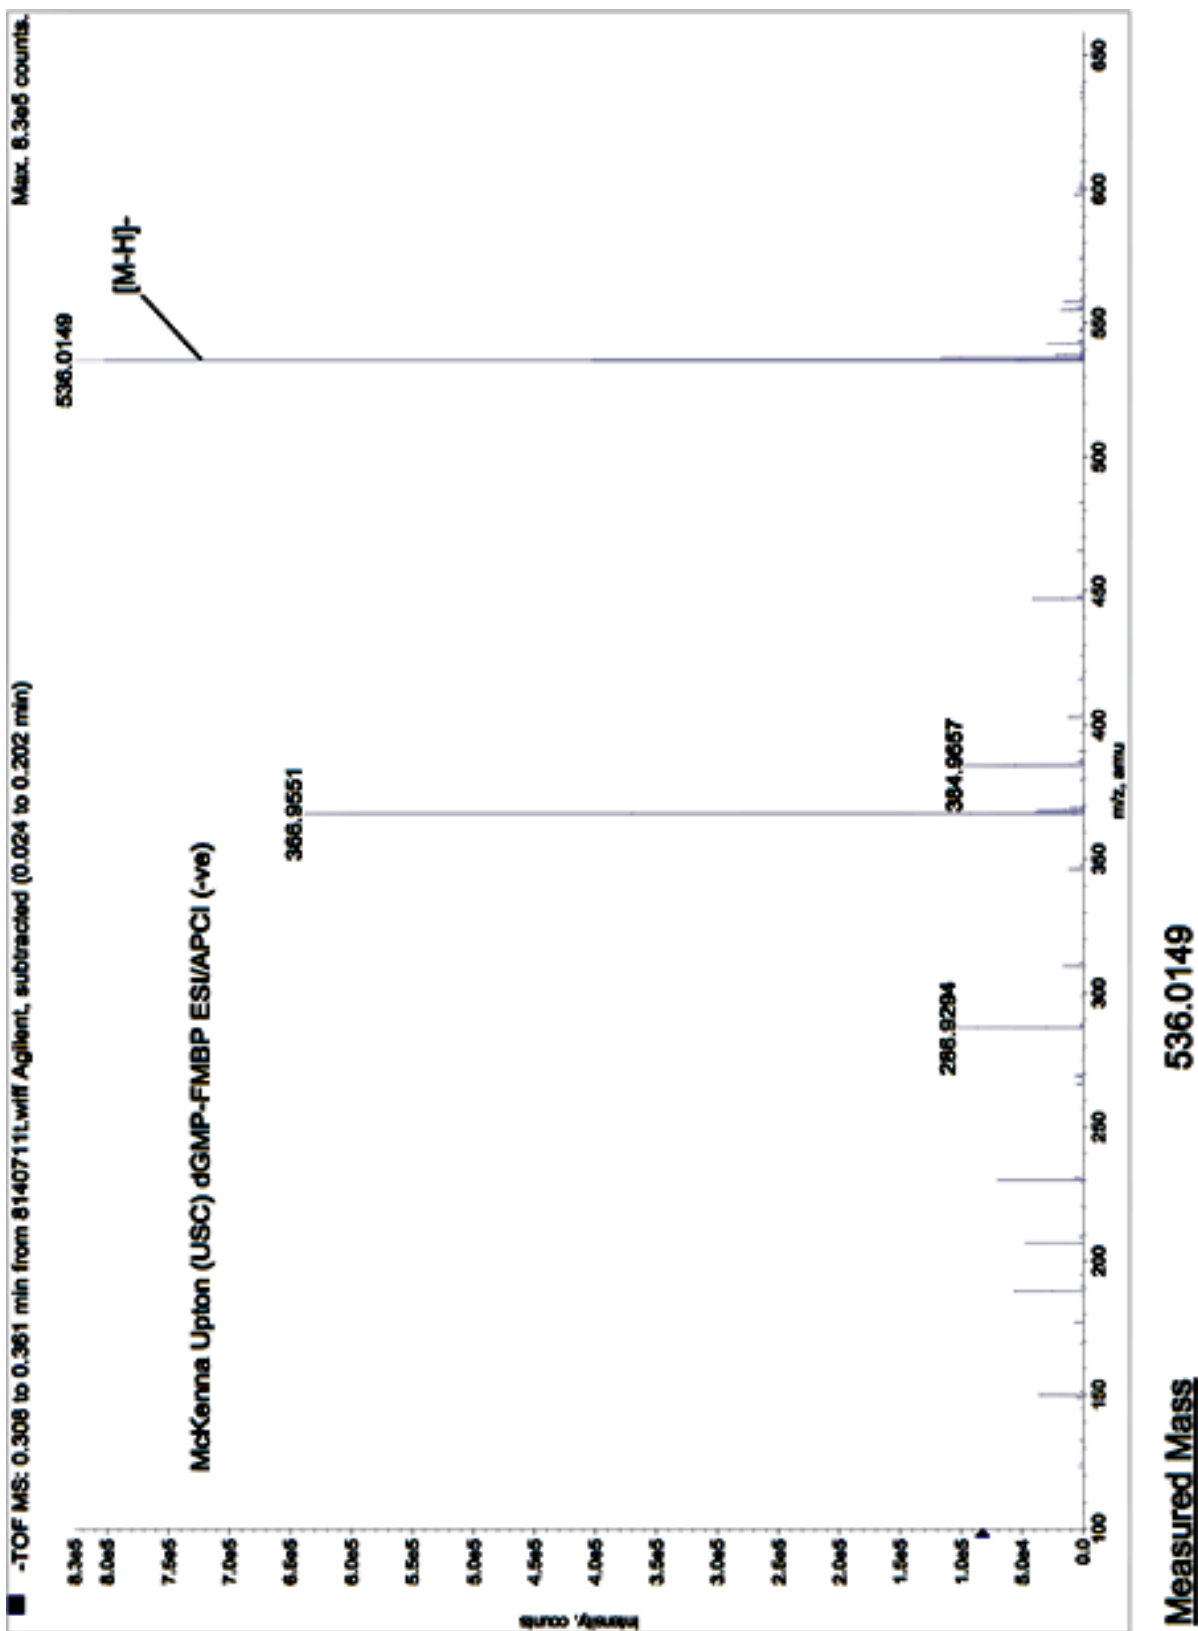

## NMR Analysis of $\beta,\gamma$ -methylene analogues of dGTP

\*NOTE\* All compounds are isolated as the triethylammonium salt after dual-pass HPLC

Figure S10.  $^1\text{H}$  NMR of dGMP- $\beta,\gamma$ -EBP, 10/11

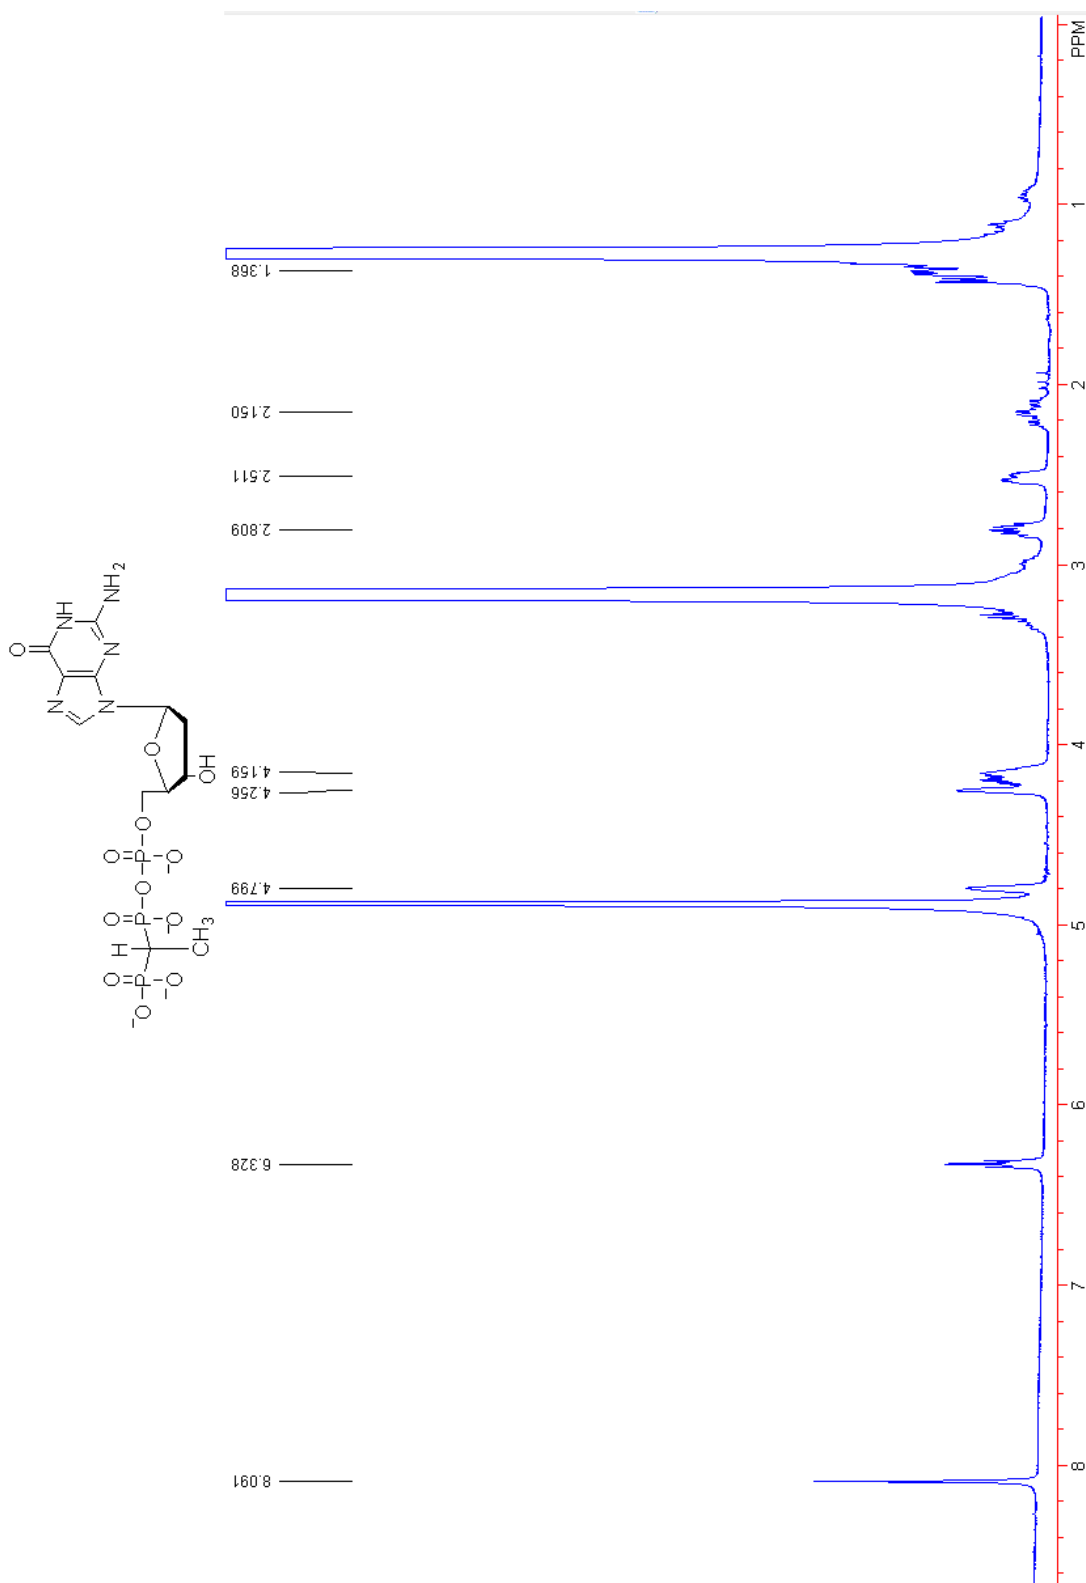

**Figure S11.**  $^{31}\text{P}$  NMR of dGMP- $\beta,\gamma$ -EBP, **10/11** ( $^1\text{H}$  decoupled)

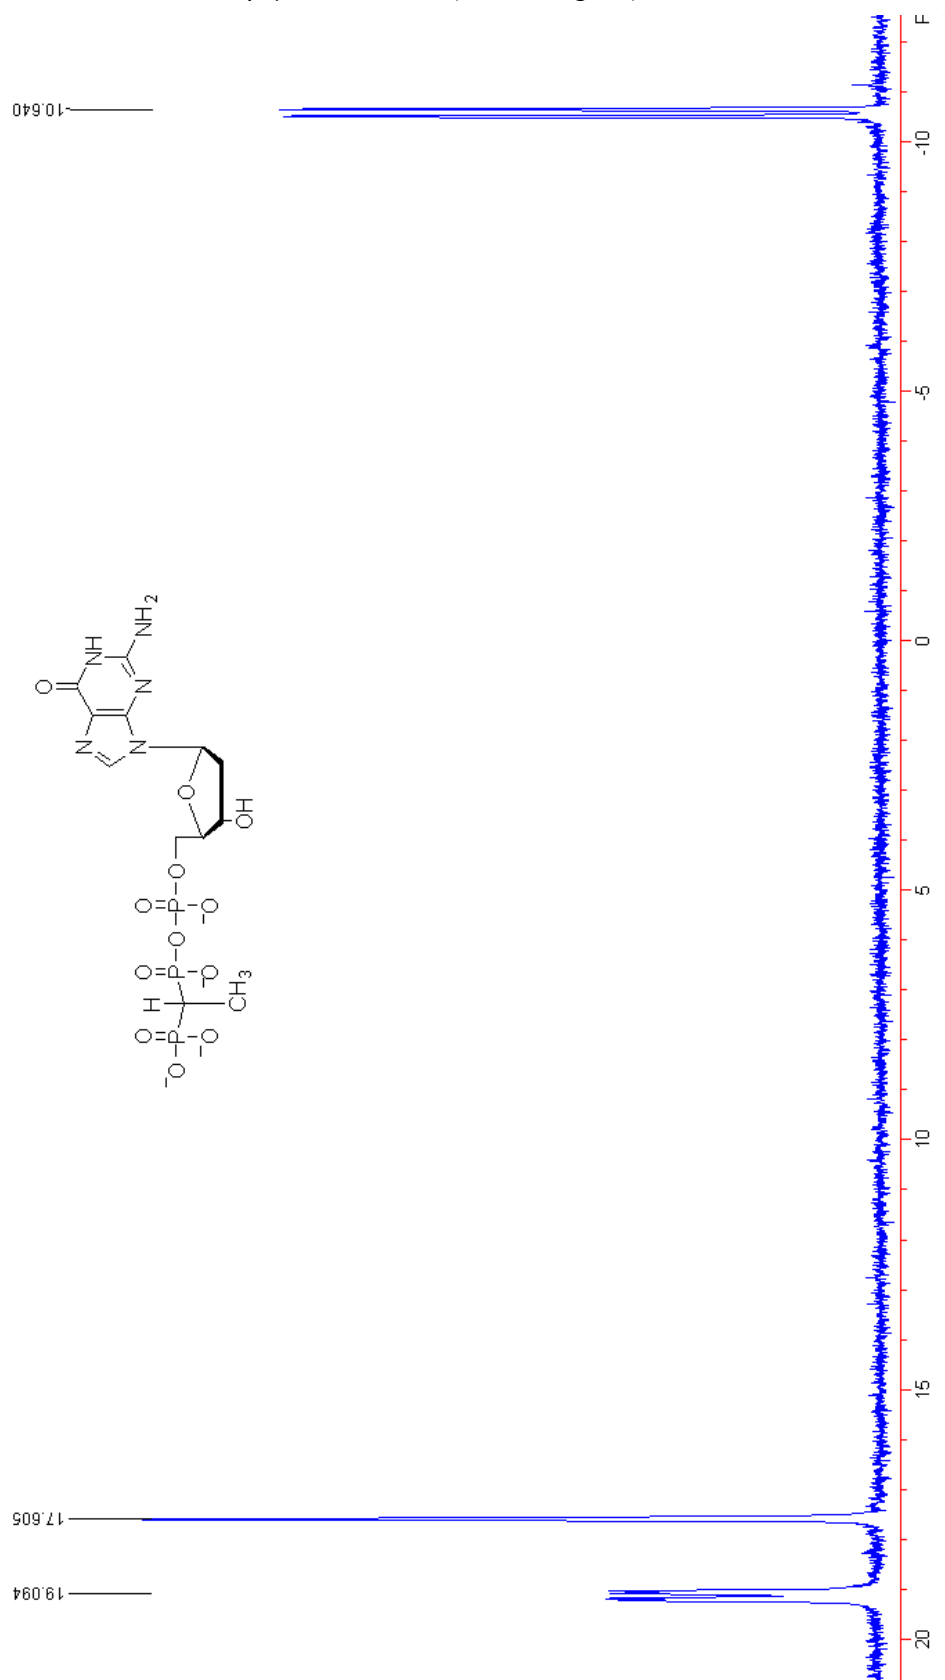

**Figure S12.**  $^1\text{H}$  NMR of dGMP- $\beta,\gamma$ -DMBP, **12**

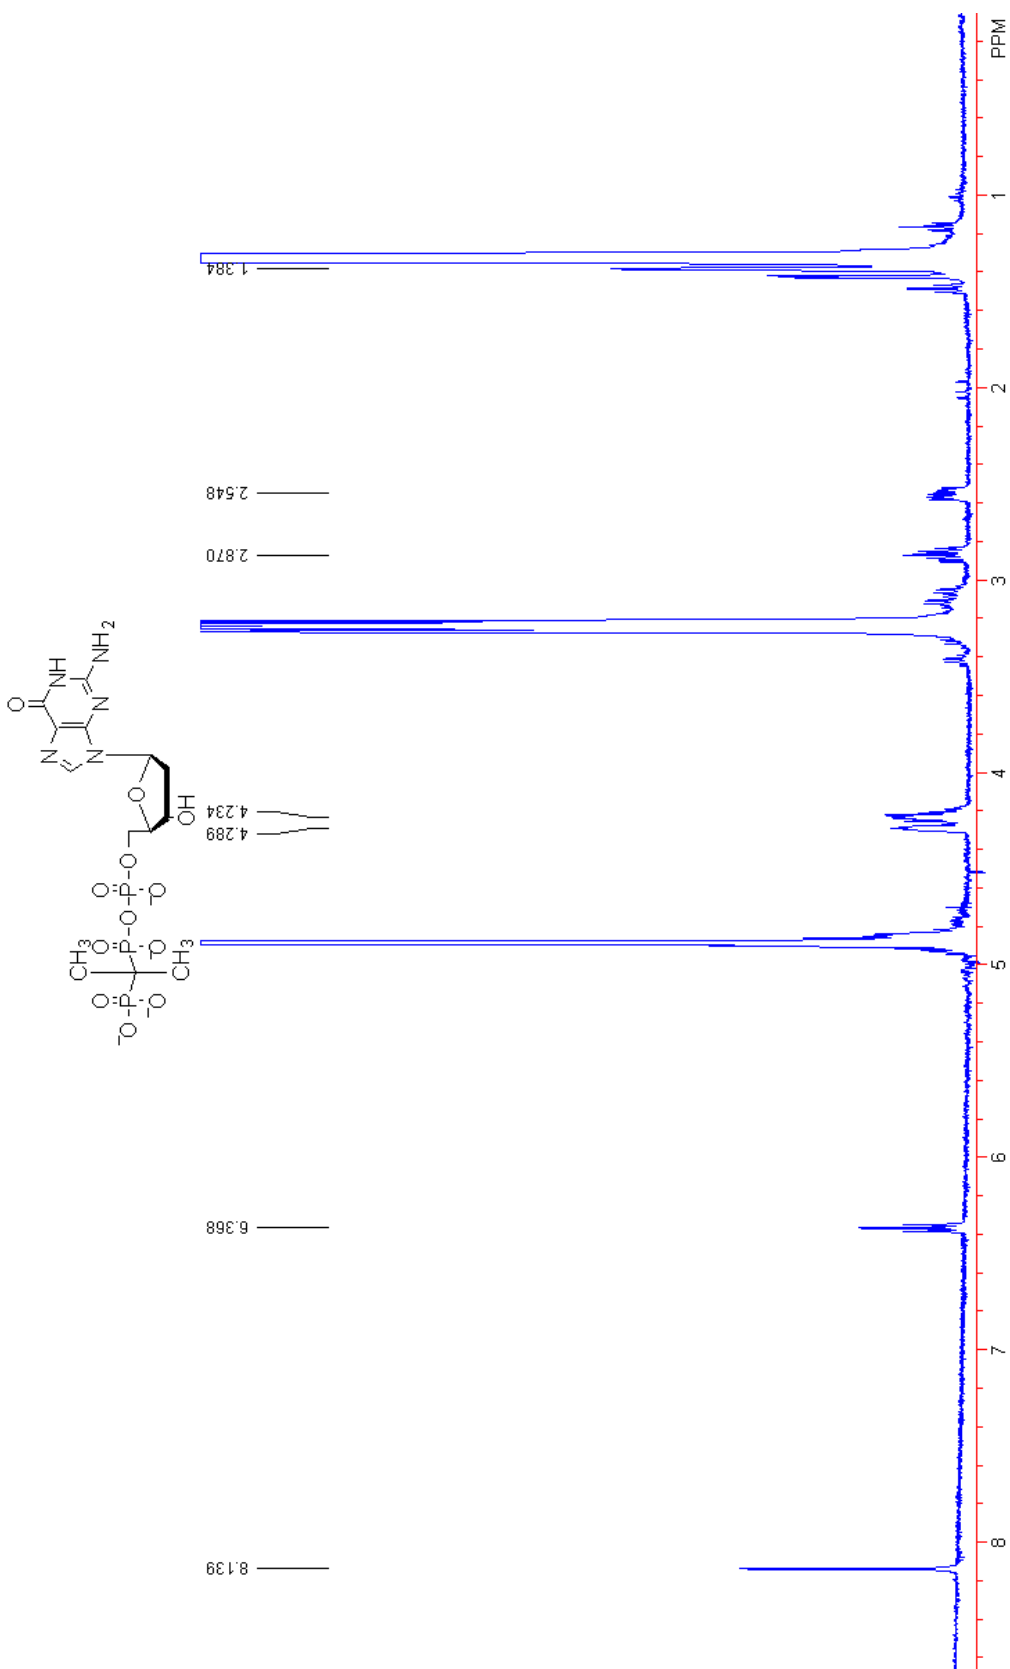

**Figure S13.**  $^{31}\text{P}$  NMR of dGMP- $\beta,\gamma$ -DMBP, **12** ( $^1\text{H}$  decoupled)

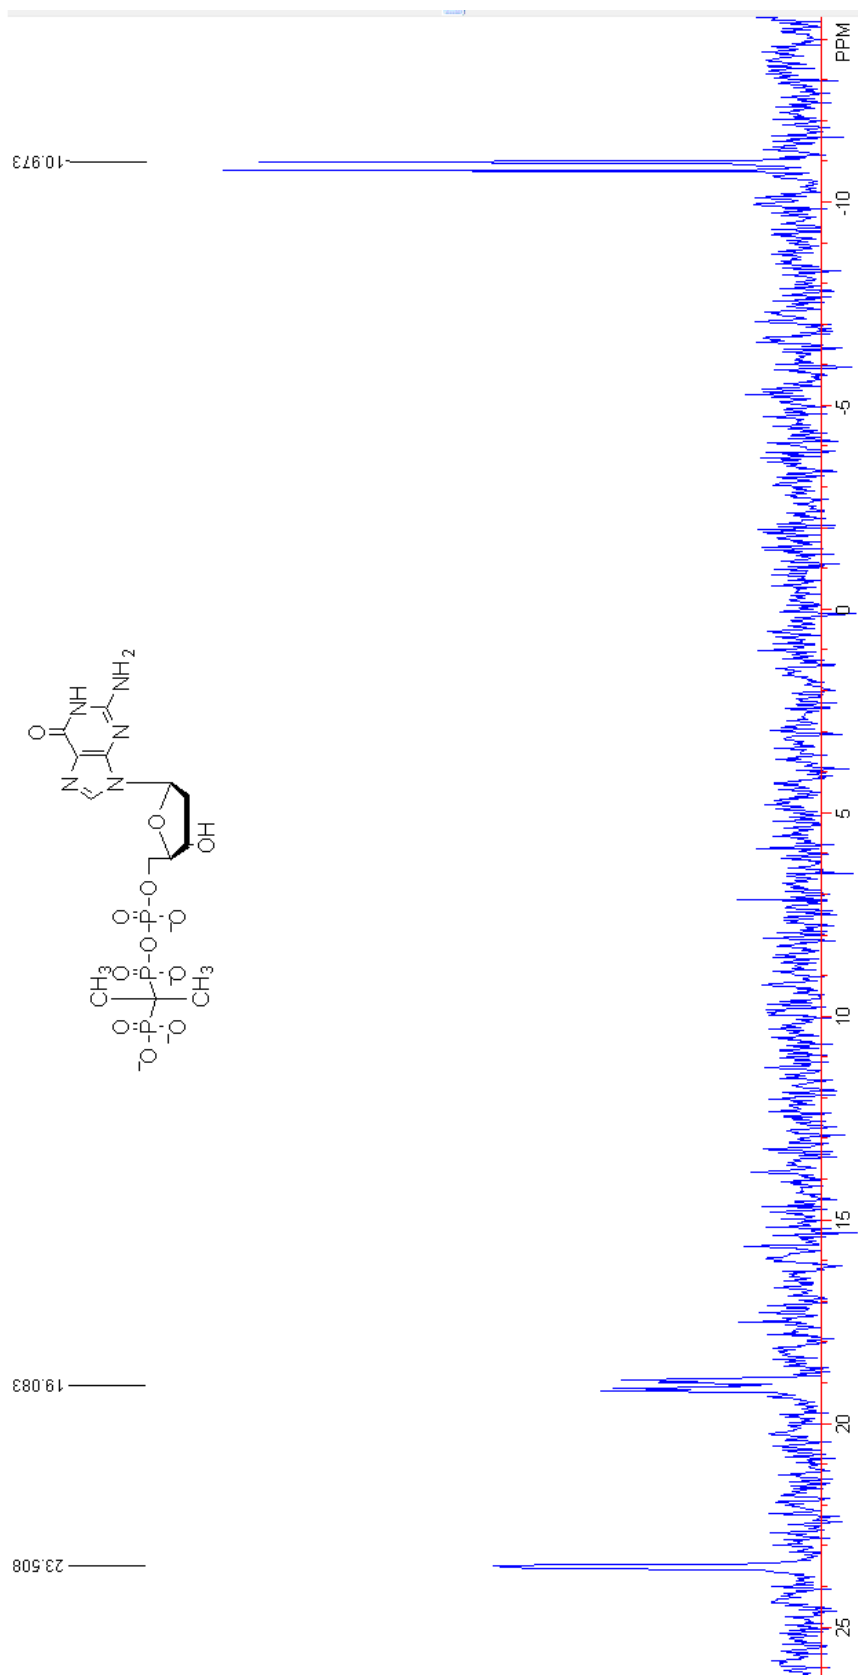

**Figure S14.**  $^1\text{H}$  NMR of dGMP- $\beta,\gamma$ -FMBP, **13/14**

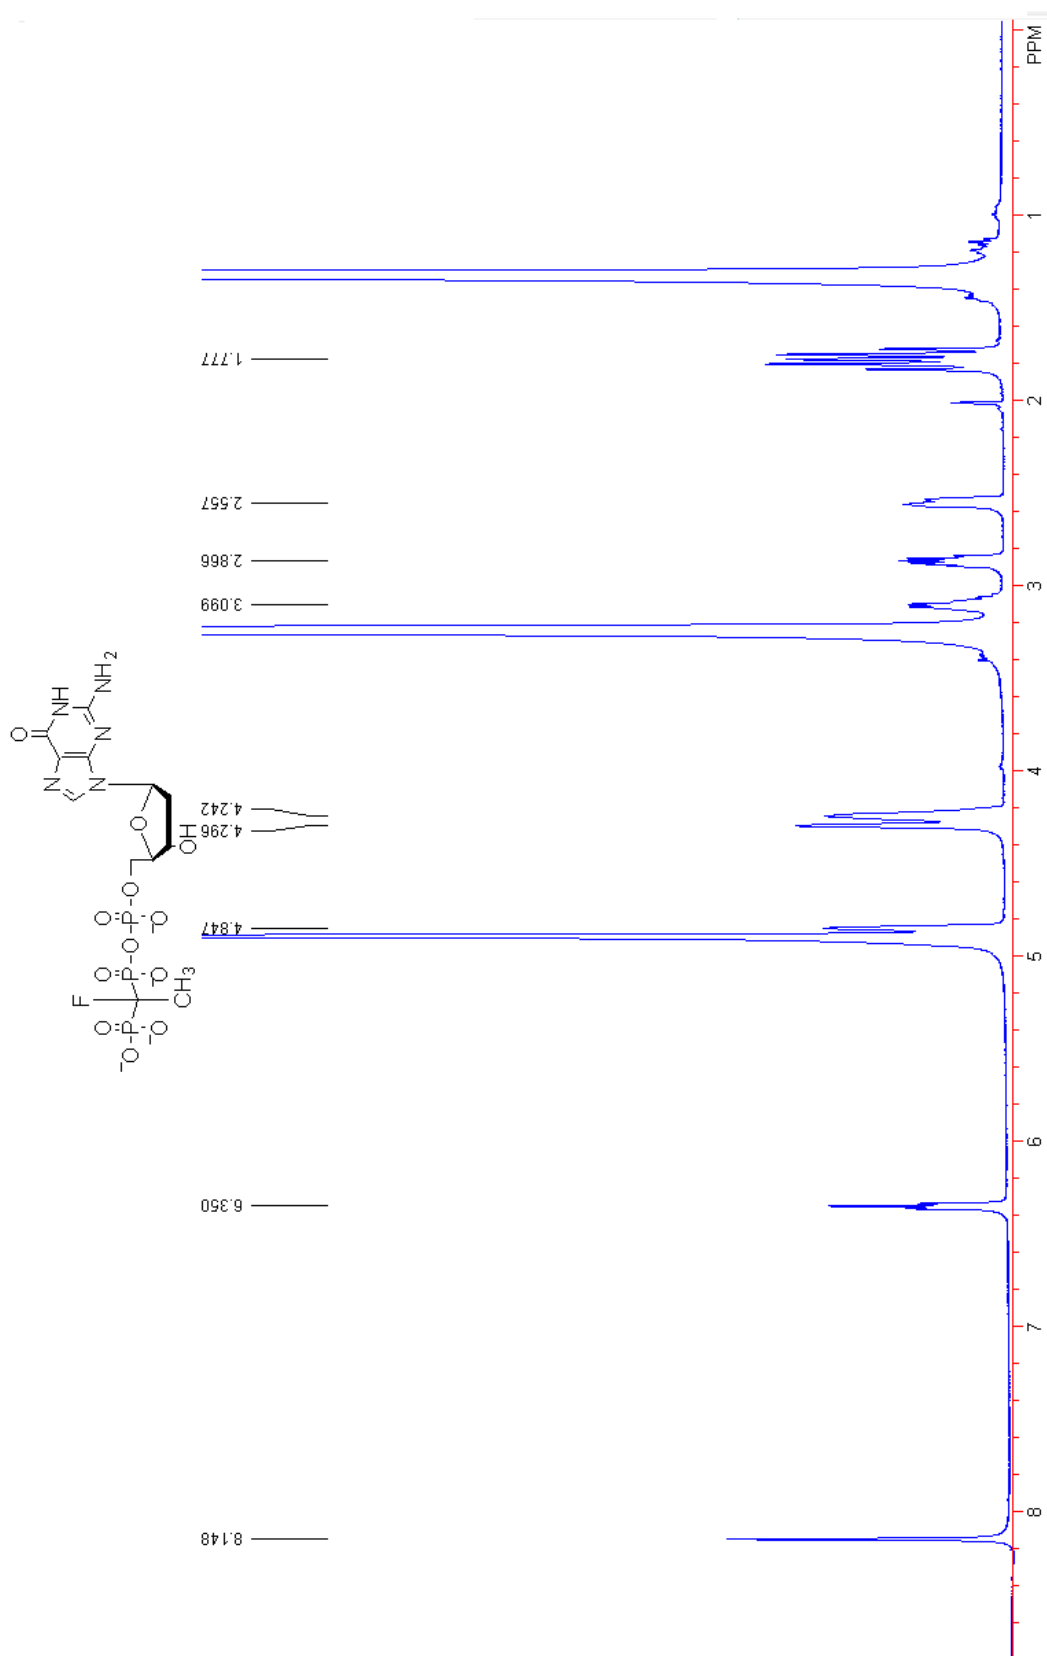

**Figure S15.**  $^{31}\text{P}$  NMR of dGMP- $\beta,\gamma$ -FMBP, **13/14** ( $^1\text{H}$  decoupled)

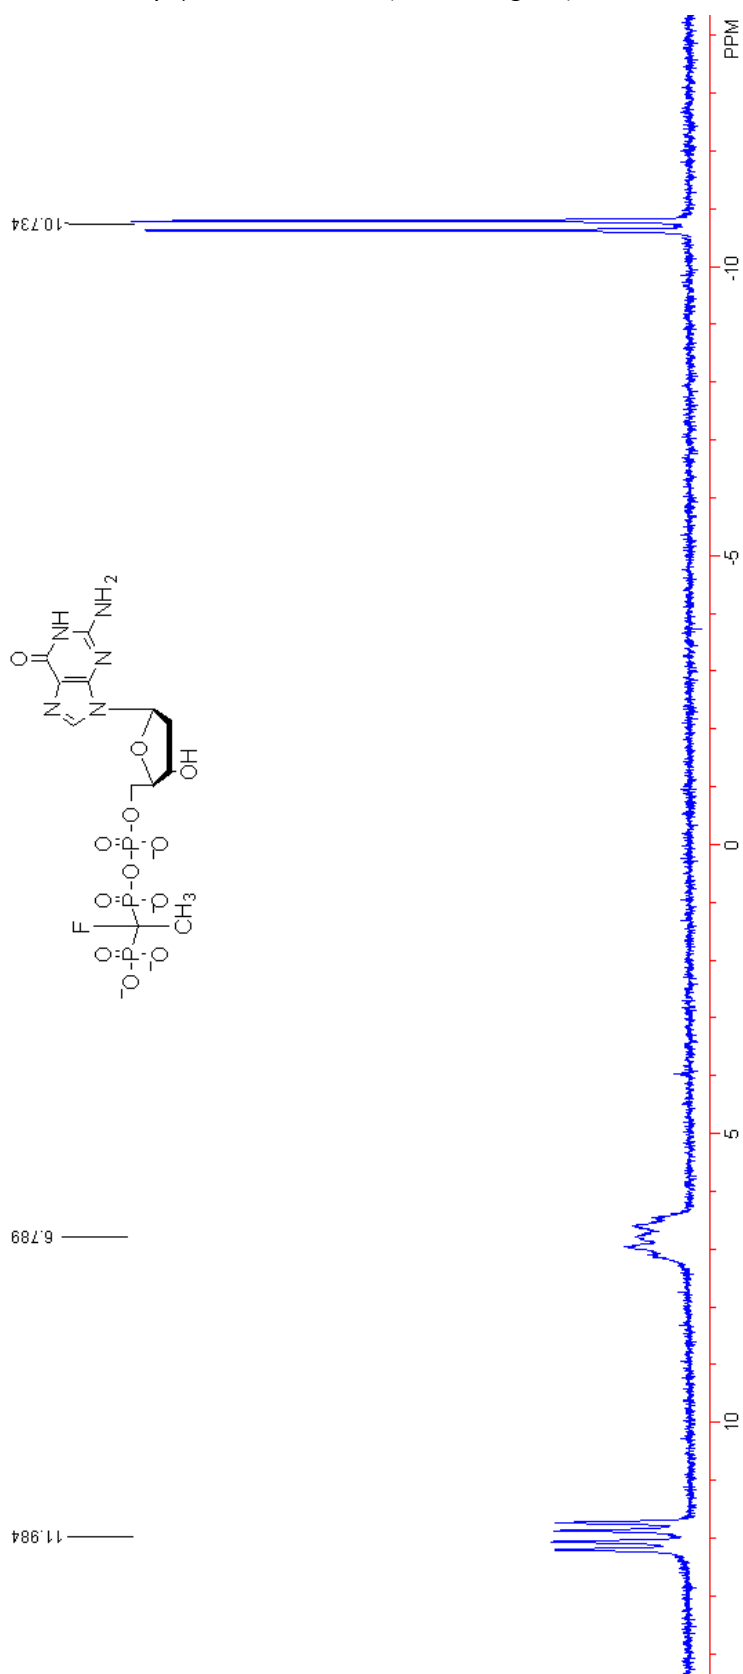

**Figure S16.**  $^{19}\text{F}$  NMR of dGMP- $\beta,\gamma$ -FMBP, **13/14**

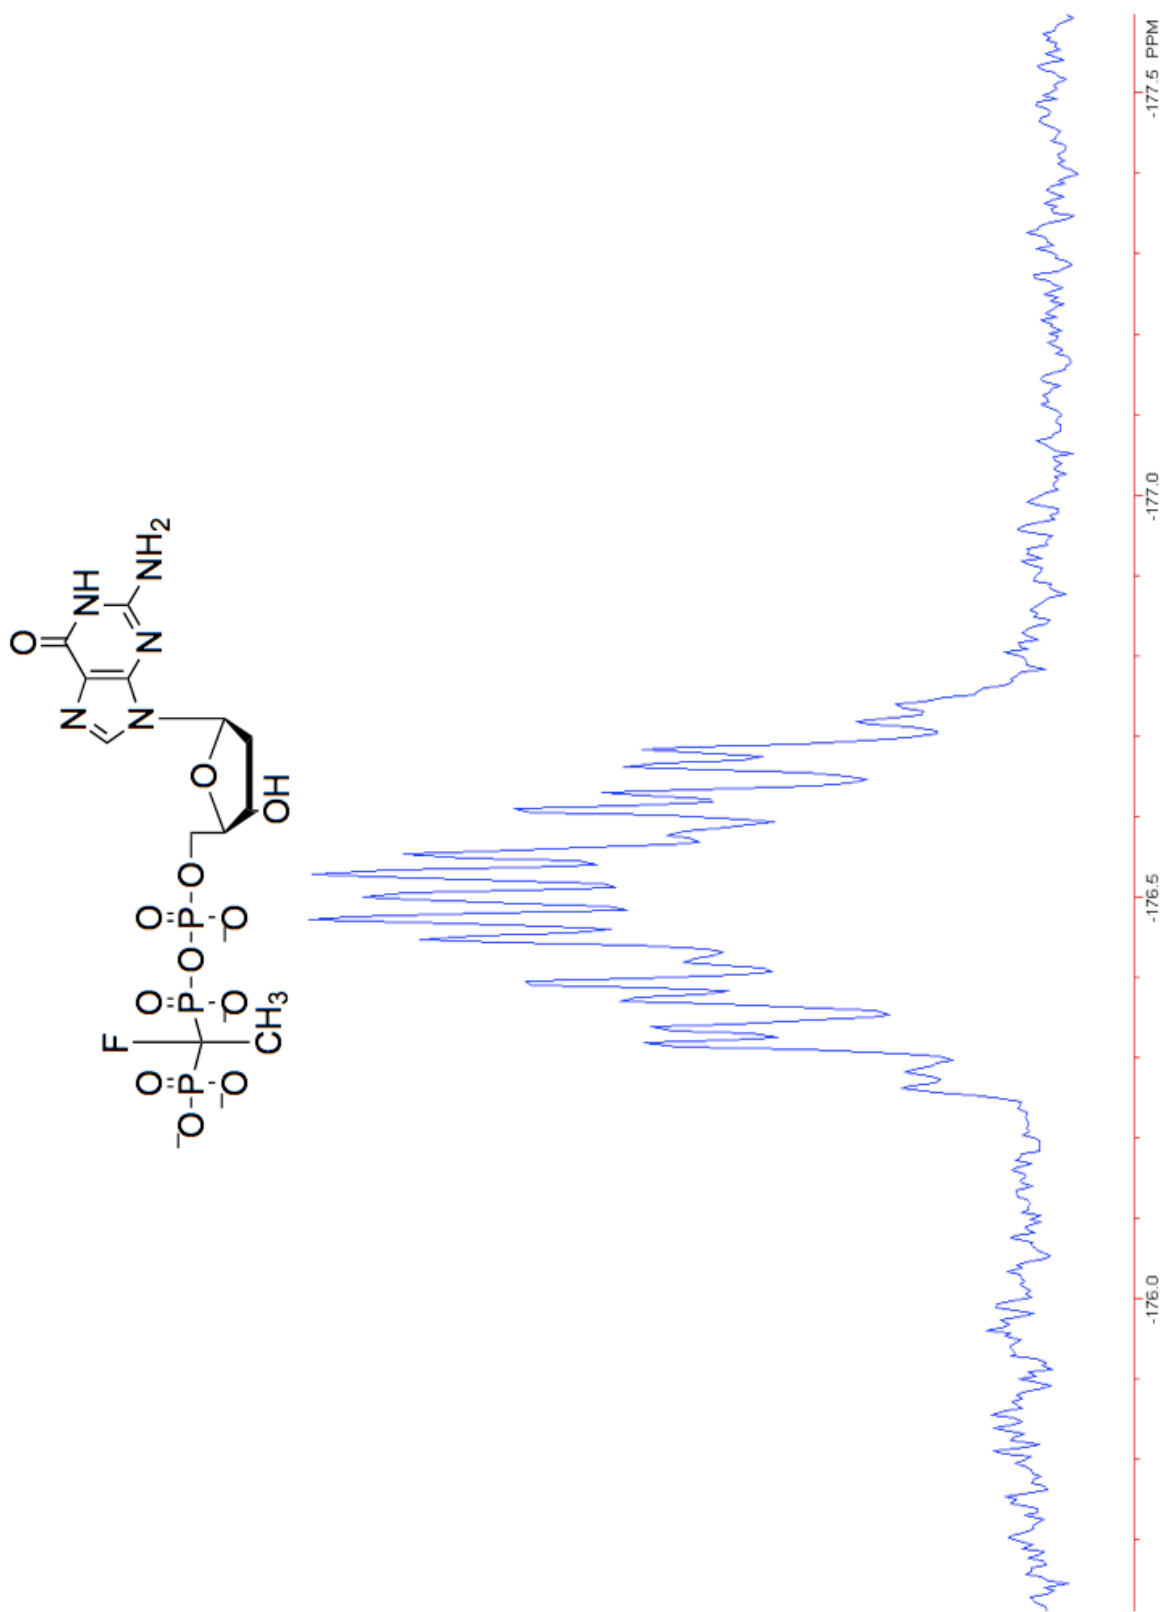

Supplement: NIHMS204944-supplement-1_si_001.pdf [file NIHMS204944-supplement-1_si_001.pdf]
